# Supplementary material for: COVID-19 Vaccine Hesitancy and Determinants of Acceptance among Healthcare Workers, Academics and Tertiary Students in Nigeria
Source: MDPI journal article supplement (doi:10.3390/vaccines10040626), 2022-04-15
Supplement: s1 [file s1]

## COVID-19 Vaccine Acceptance and Hesitancy among Nigerian Healthcare Workers, Academics and Tertiary Students

Table S1. Questionnaire.

**This survey is only for research purposes and the confidentiality of all respondents is fully guaranteed. So, be free and very sincere as you provide your responses to all the 27 questions**

*Please provide your response to the questions by ticking the appropriate option(s) in the response column*

| S/no                     | Questions or information required                              | Response |
|--------------------------|----------------------------------------------------------------|----------|
| <b>SOCIODEMOGRAPHICS</b> |                                                                |          |
| 1.                       | <b>Gender</b>                                                  |          |
|                          | Male                                                           |          |
|                          | Female                                                         |          |
| 2.                       | <b>State of residence in Nigeria</b>                           |          |
| 3.                       | <b>Occupation/Job description</b>                              |          |
|                          | Healthcare worker                                              |          |
|                          | Academic                                                       |          |
|                          | Student (higher/tertiary institutions)                         |          |
| 4.                       | <b>If you are a student, please specify your year of study</b> |          |
|                          | < 3rd year (undergraduate)                                     |          |
|                          | ≥ 3rd year (undergraduate)                                     |          |
|                          | Postgraduate                                                   |          |
|                          | Not applicable                                                 |          |
| 5.                       | <b>Age category</b>                                            |          |
|                          | 16-30                                                          |          |
|                          | 31-45                                                          |          |
|                          | 46-60                                                          |          |
|                          | ≥61                                                            |          |
| 6.                       | <b>Marital status</b>                                          |          |
|                          | Single                                                         |          |
|                          | Married                                                        |          |
|                          | Divorced                                                       |          |
| 7.                       | <b>Religion</b>                                                |          |
|                          | Christianity                                                   |          |
|                          | Islam                                                          |          |
|                          | Others                                                         |          |
| 8.                       | <b>Highest educational level attained</b>                      |          |

|                                                           |                                                                                                 |  |
|-----------------------------------------------------------|-------------------------------------------------------------------------------------------------|--|
|                                                           | Postgraduate                                                                                    |  |
|                                                           | Graduate                                                                                        |  |
|                                                           | Undergraduate                                                                                   |  |
| <b>COVID-19 TESTING AND INFECTION STATUSES</b>            |                                                                                                 |  |
| <b>9.</b>                                                 | <b>Have you been tested for COVID-19?</b>                                                       |  |
|                                                           | Yes                                                                                             |  |
|                                                           | No                                                                                              |  |
| <b>10.</b>                                                | <b>Have you been confirmed to have contracted COVID-19 before?</b>                              |  |
|                                                           | Yes                                                                                             |  |
|                                                           | No                                                                                              |  |
| <b>11.</b>                                                | <b>If not tested yet, are you willing to be tested for COVID-19?</b>                            |  |
|                                                           | Yes                                                                                             |  |
|                                                           | No                                                                                              |  |
|                                                           | Not applicable                                                                                  |  |
| <b>12.</b>                                                | <b>Were you exposed to people confirmed to have contracted COVID-19 or died of the disease?</b> |  |
|                                                           | Yes                                                                                             |  |
|                                                           | No                                                                                              |  |
|                                                           | May be                                                                                          |  |
| <b>AVAILABILITY AND ACCESSIBILITY OF COVID-19 VACCINE</b> |                                                                                                 |  |
| <b>13.</b>                                                | <b>Are WHO approved COVID-19 vaccine available in your area?</b>                                |  |
|                                                           | Yes                                                                                             |  |
|                                                           | No                                                                                              |  |
|                                                           | I do not know                                                                                   |  |
| <b>14.</b>                                                | <b>Are you willing to be vaccinated against COVID-19?</b>                                       |  |
|                                                           | Yes                                                                                             |  |
|                                                           | No                                                                                              |  |
| <b>15.</b>                                                | <b>Do you know HOW and WHERE to be vaccinated with COVID-19?</b>                                |  |
|                                                           | Yes                                                                                             |  |
|                                                           | No                                                                                              |  |
| <b>16.</b>                                                | <b>Is the vaccine easily accessible to you?</b>                                                 |  |
|                                                           | Yes                                                                                             |  |
|                                                           | No                                                                                              |  |
| <b>17.</b>                                                | <b>*If the vaccine is not easily accessible to you, what could be the major cause(s)?</b>       |  |
|                                                           | Very limited supply of the vaccine                                                              |  |
|                                                           | Do not know how and or where to access the vaccine                                              |  |

|                                                  |                                                                                                                                           |  |
|--------------------------------------------------|-------------------------------------------------------------------------------------------------------------------------------------------|--|
|                                                  | My age category is not among the priority group                                                                                           |  |
|                                                  | Not applicable                                                                                                                            |  |
|                                                  | Do not know how and where to register and access the vaccine                                                                              |  |
| 18.                                              | <b>Do you think that more public enlightenment and grass-root awareness on HOW and WHERE to access the vaccine in Nigeria is needful?</b> |  |
|                                                  | Yes                                                                                                                                       |  |
|                                                  | No                                                                                                                                        |  |
| <b>COVID-19 VACCINE ACCEPTANCE AND HESITANCE</b> |                                                                                                                                           |  |
| 19.                                              | <b>Are you aware that COVID-19 vaccines are available for use in Nigeria?</b>                                                             |  |
|                                                  | Yes                                                                                                                                       |  |
|                                                  | No                                                                                                                                        |  |
| 20.                                              | <b>Have you been vaccinated against COVID-19</b>                                                                                          |  |
|                                                  | Yes                                                                                                                                       |  |
|                                                  | No                                                                                                                                        |  |
| 21.                                              | <b>If vaccinated, which of the approved vaccines did you receive?</b>                                                                     |  |
|                                                  | AstraZeneca/Oxford vaccine®                                                                                                               |  |
|                                                  | Johnson and Johnson®                                                                                                                      |  |
|                                                  | Moderna®                                                                                                                                  |  |
|                                                  | Pfizer/BionTech®                                                                                                                          |  |
|                                                  | Sinopharm®                                                                                                                                |  |
|                                                  | Sinovac®                                                                                                                                  |  |
|                                                  | Sputnik-V®                                                                                                                                |  |
| 22.                                              | <b>If vaccinated, how many doses of the vaccine have you received?</b>                                                                    |  |
|                                                  | One                                                                                                                                       |  |
|                                                  | Two                                                                                                                                       |  |
|                                                  | More than two                                                                                                                             |  |
|                                                  | Not applicable                                                                                                                            |  |
| 23.                                              | <b>*If vaccinated, what informed your confidence on the safety/efficiency of the vaccine?</b>                                             |  |
|                                                  | WHO public health advice on the vaccine                                                                                                   |  |
|                                                  | Important political/community/religious leaders who have received the vaccine                                                             |  |
|                                                  | Reputation of the vaccine manufacturers                                                                                                   |  |
|                                                  | Confidence in Nigerian government/health system                                                                                           |  |
|                                                  | Influence of friends or relatives                                                                                                         |  |
|                                                  | Not applicable                                                                                                                            |  |
| 24.                                              | <b>*If you are not vaccinated yet, why?</b>                                                                                               |  |
|                                                  | COVID-19 vaccination request/registration protocol is difficult due to                                                                    |  |

|                                                            |                                                                                                                                                         |  |
|------------------------------------------------------------|---------------------------------------------------------------------------------------------------------------------------------------------------------|--|
|                                                            | limited internet access in some parts of the country                                                                                                    |  |
|                                                            | Suspicion/doubts on safety of novel vaccines                                                                                                            |  |
|                                                            | COVID-19 is a hoax                                                                                                                                      |  |
|                                                            | The vaccines are not available/accessible in my locality                                                                                                |  |
|                                                            | Herbal medicines/home remedies are effective for cure/management of COVID-19                                                                            |  |
|                                                            | Influence from anti-COVID-19-vaccine movements                                                                                                          |  |
|                                                            | Vaccination is against my religious beliefs or personal ideology                                                                                        |  |
|                                                            | Concerns about long term health/side effects                                                                                                            |  |
|                                                            | Scepticism about the vaccine due to hasty production/roll out                                                                                           |  |
|                                                            | Preventive measures are enough to protect against COVID-19                                                                                              |  |
|                                                            | Bad feelings towards the vaccines due to negative social media reports/rumours                                                                          |  |
|                                                            | Not applicable                                                                                                                                          |  |
| <b>25.</b>                                                 | <b>*Some health concerns preventing me from getting vaccinated are:</b>                                                                                 |  |
|                                                            | Blood clot issues among women                                                                                                                           |  |
|                                                            | Allergic reactions                                                                                                                                      |  |
|                                                            | Innate immunity concerns                                                                                                                                |  |
|                                                            | New or worsening muscle/joint pains                                                                                                                     |  |
|                                                            | Myocardial infarction                                                                                                                                   |  |
|                                                            | People say the vaccine is not good                                                                                                                      |  |
|                                                            | Not applicable                                                                                                                                          |  |
| <b>26.</b>                                                 | <b>*Some of my fears against COVID-19 vaccine are:</b>                                                                                                  |  |
|                                                            | The vaccines may be unsafe due to its hasty production and or roll out                                                                                  |  |
|                                                            | The vaccine may contain 'hidden chip' that may be a mark of the anti-Christ                                                                             |  |
|                                                            | It may limiting procreation and fertility and hence a population control strategy                                                                       |  |
|                                                            | The vaccine may cause deaths as one certain vaccine did in Kano State, Nigeria                                                                          |  |
|                                                            | Not applicable                                                                                                                                          |  |
|                                                            | The vaccine may cause adverse immunological problem as mRNA vaccine are relatively new and sufficient time is needed to proof their safety and efficacy |  |
| <b>IMPROVEMENT OF COVID-19 AVAILABILITY AND ACCEPTANCE</b> |                                                                                                                                                         |  |
| <b>27.</b>                                                 | <b>*In which ways can COVID-19 vaccine availability and acceptance be improved in Nigeria?</b>                                                          |  |
|                                                            | More COVID-19 vaccine donations from developed to developing countries                                                                                  |  |

|  |                                                                                                                                                   |  |
|--|---------------------------------------------------------------------------------------------------------------------------------------------------|--|
|  | Increased funding to the Nigerian health and education/research sectors                                                                           |  |
|  | More public enlightenment campaigns/grass-root health education to the populace                                                                   |  |
|  | Procurement of more COVID-19 vaccines                                                                                                             |  |
|  | Commencement of indigenous COVID-19 production                                                                                                    |  |
|  | Provision of COVID-19 storage and distribution facilities                                                                                         |  |
|  | Increased remuneration and provision of incentives to healthcare workers                                                                          |  |
|  | Developed countries should halt 3 <sup>rd</sup> COVID-19 booster vaccination to increase the availability of the vaccines in developing countries |  |
|  | Others (please specify)                                                                                                                           |  |

*\*Respondents may provide more than one response as may be appropriate*
